# Supplementary material for: A hemilabile 2-(2′-pyridyl)-imidazole based nickel(ii) complex: proton-coupled-electron-transfer, bactericidal and cytotoxicity studies
Source: Royal Society of Chemistry journal article supplement (doi:10.1039/d2nj03063b), 2022-01-01
Supplement: d2nj03063b1.pdf [file d2nj03063b1.pdf]

## Supporting Information

### **A Hemilabile 2-(2'-pyridyl)-imidazole Based Nickel(II) Complex: Proton-coupled-electron-transfer, Bactericidal and Cytotoxicity Studies†**

Krishnendu Paramanik,<sup>a</sup> Nilaj Bandopadhyay,<sup>a</sup> Rakesh Debnath,<sup>a</sup> Suvojit Roy,<sup>a</sup> Muddukrishnaiah Kotakonda,<sup>b</sup>  
Mrinal Kanti Adak,<sup>c</sup> Bhaskar Biswas,<sup>\*a</sup> and Hari Sankar Das<sup>\*a</sup>

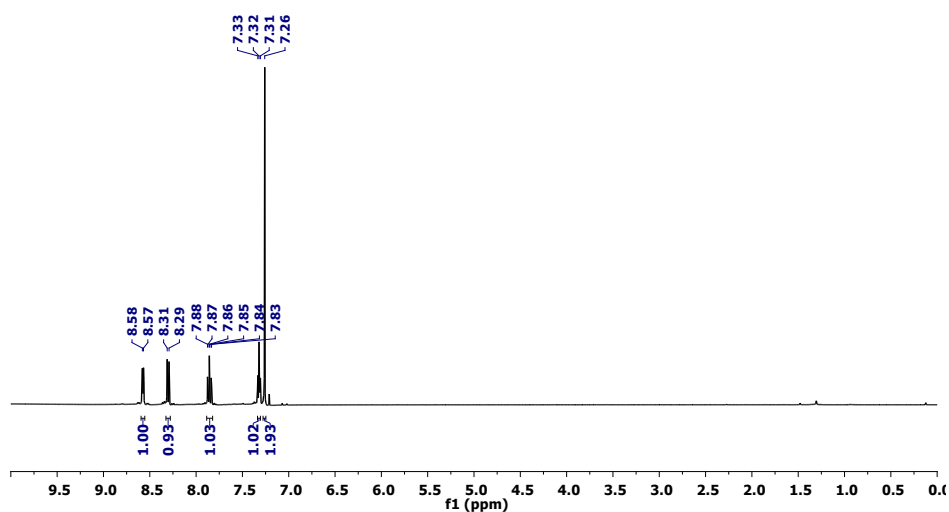

Fig. S1. <sup>1</sup>H NMR spectra of ligand L.

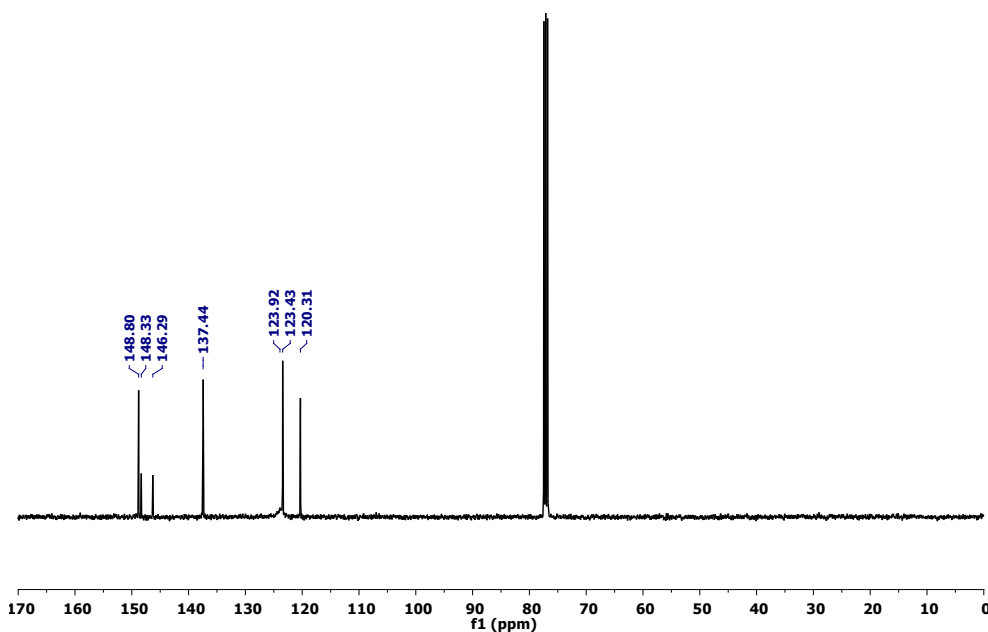

Fig. S2. <sup>13</sup>C{<sup>1</sup>H} NMR spectra of ligand L.

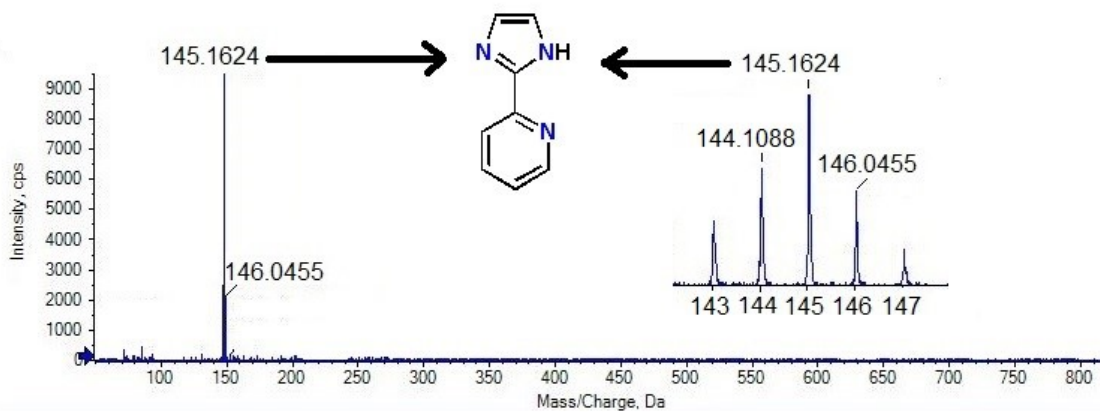

**Fig. S3.** ESI-MS spectrum of Ligand L in methanol.

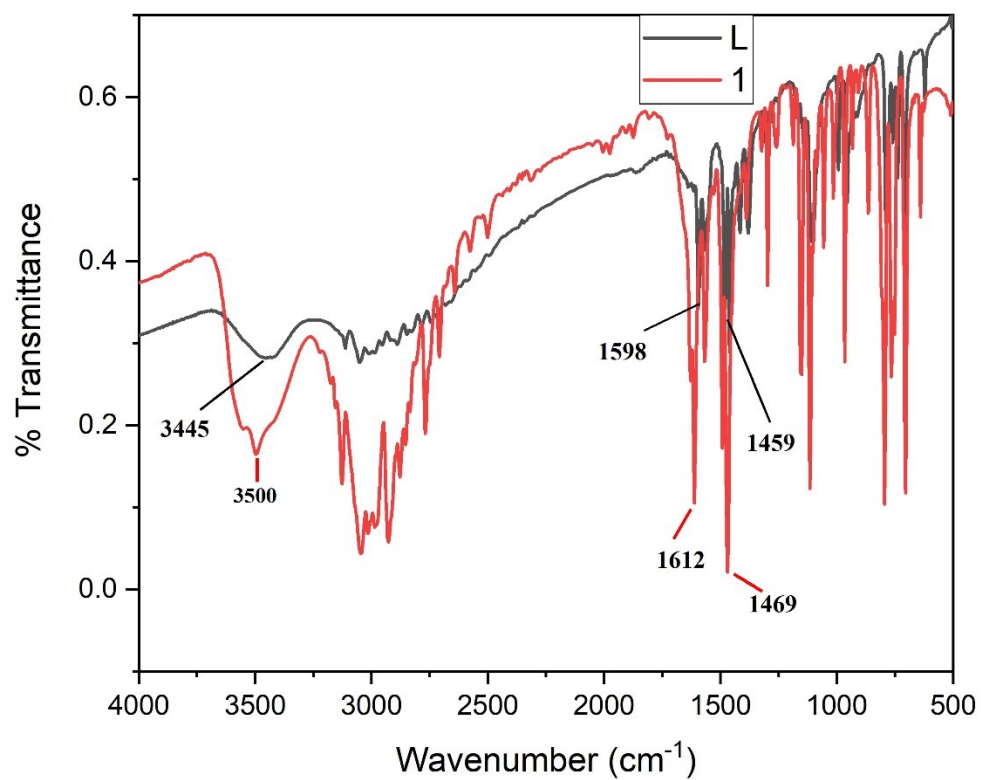

**Fig. S4.** FT-IR spectra of ligand L, complex 1.

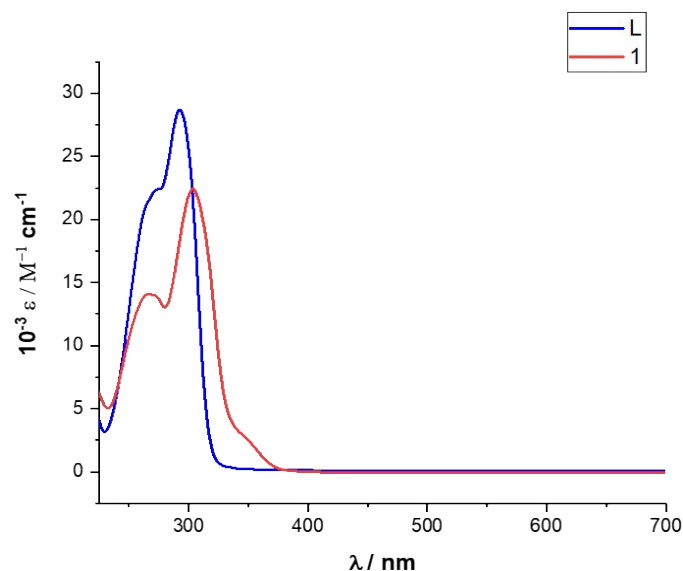

**Fig. S5.** UV-Vis spectra of the ligand, **L** and complex **1** in water.

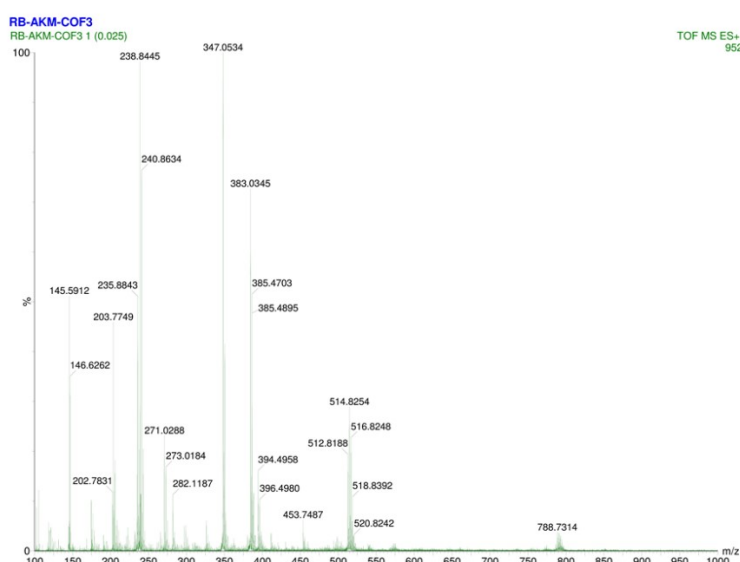

**Fig. S6.** ESI-MS spectrum of Complex **1** in methanol.

### Synthesis of complex **1**':

The complex was synthesised according to the reported procedure.<sup>1</sup>

Yield: 0.265 g (~84%). Anal. calc. for  $C_{16}H_{16}N_6NiO_2$ (**1**): C, 50.17; H, 4.21; N, 21.94; Found: C, 50.43; H, 4.02; N, 21.67. IR (KBr,  $cm^{-1}$ ; Fig. S6): 3425 ( $\nu_{N-H}$ ), 1605 ( $\nu_{C=N}$ ), 1496 ( $\nu_{C-N,Py}$ ); ESI-MS ( $m/z$ ; Fig. S7) calc. for  $C_{16}H_{14}ClN_6Ni$  [ $M + H$ ]<sup>+</sup> 383.08, found 383.0349.

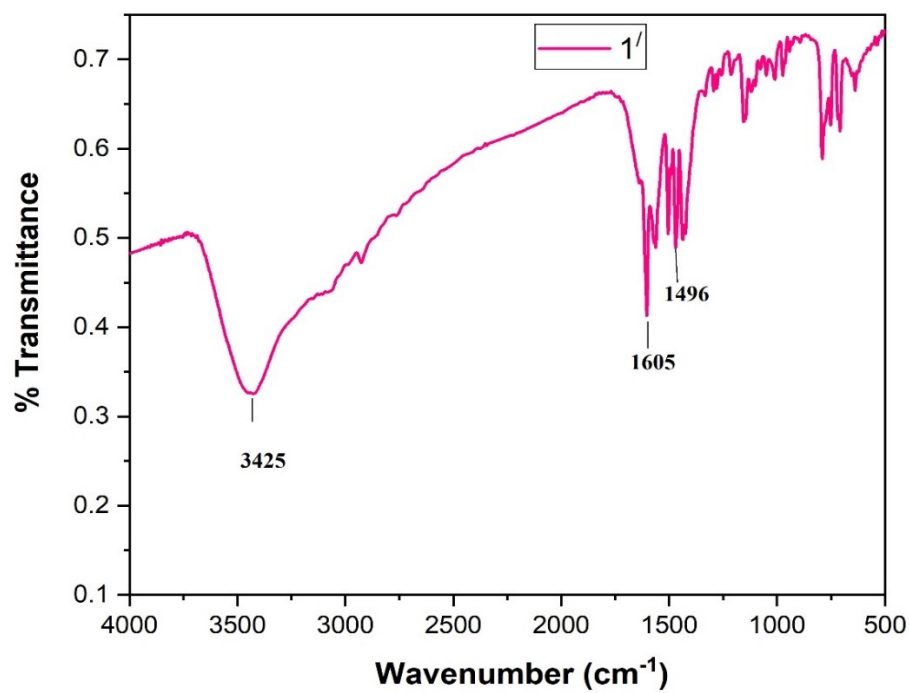

Fig. S7. FT-IR spectra of complex 1'.

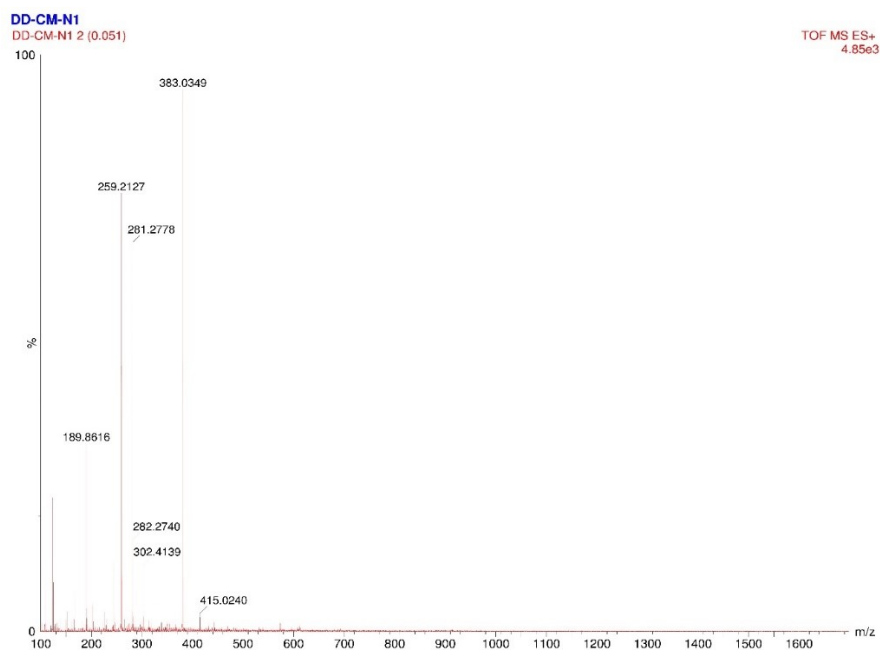

Fig. S8. ESI-MS spectrum of Complex 1' in methanol.

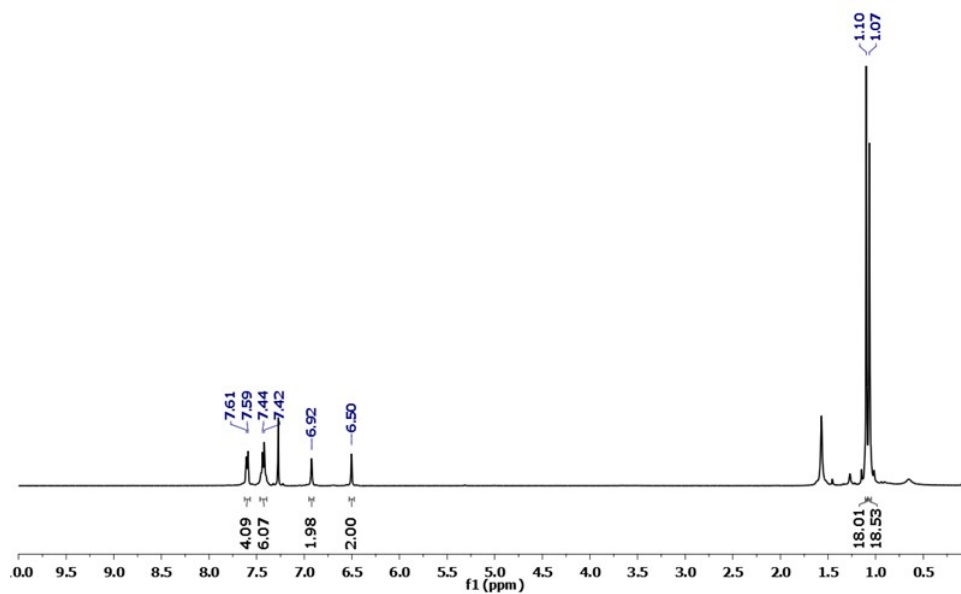

Fig. S9.  $^1\text{H}$  NMR spectra of complex 2.

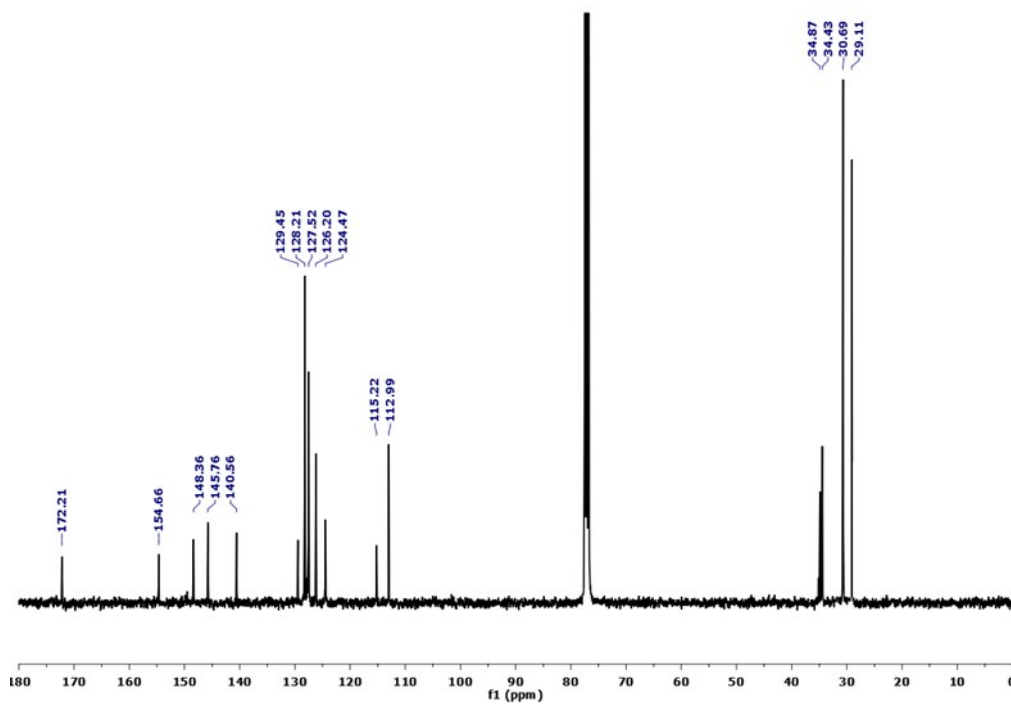

Fig. S10.  $^{13}\text{C}\{^1\text{H}\}$  NMR spectra of complex 2.

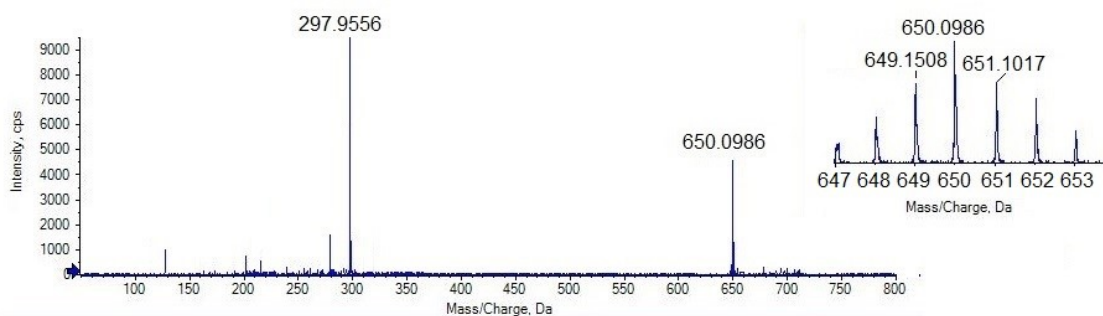

**Fig. S11.** ESI-MS spectrum of Complex **2** in methanol.

**Table S1.** Selected bond lengths (Å) and bond angles (°) for **1**

| Bonds   | Bond lengths |            | Bonds  | Bond lengths |            |
|---------|--------------|------------|--------|--------------|------------|
|         | Experimental | Calculated |        | Experimental | Calculated |
| Ni1-Cl1 | 2.430(18)    | 2.514      | Ni1-N1 | 2.122(17)    | 2.178      |
| Ni1-N2  | 2.031(16)    | 2.041      | C3-C2  | 1.305(17)    | 1.395      |
| N1-C5   | 1.346(14)    | 1.365      | N1-C1  | 1.317(14)    | 1.343      |
| N2-C6   | 1.313(14)    | 1.338      | N2-C8  | 1.373(14)    | 1.381      |
| N3-C6   | 1.346(14)    | 1.371      | N3-C7  | 1.363(15)    | 1.392      |
| C6-C5   | 1.416(15)    | 1.451      | C5-C4  | 1.365(15)    | 1.397      |
| C8-C7   | 1.352(15)    | 1.375      | C1-C2  | 1.400(16)    | 1.395      |
| C4-C3   | 1.400(16)    | 1.394      |        |              |            |

| Bond angles  | Experimental | Calculated | Bond angles | Experimental | Calculated |
|--------------|--------------|------------|-------------|--------------|------------|
| Cl1-Ni1-N1   | 88.79(18)    | 82.1920    | Cl1-Ni1-N2  | 94.32(19)    | 90.7353    |
| Cl1-Ni1-Cl1a | 94.46(7)     | 96.7544    | Cl1-Ni1-N1  | 171.14(17)   | 166.9277   |
| Cl1-Ni1-N2   | 92.67(19)    | 90.7353    | N1-Ni1-N2   | 78.9(2)      | 77.9765    |
| Ni1-N2-C8    | 139.0(5)     | 135.3700   | N1-Ni1-N1a  | 89.2(2)      | 93.2830    |
| N1-Ni1-N2a   | 93.8(2)      | 100.3512   | Ni1-N1-C1   | 128.0(5)     | 126.9364   |
| Ni1-N2-C6    | 113.0(5)     | 114.3832   | N2-Ni1-N2a  | 169.7(3)     | 177.6106   |
| Ni1-N1-C5    | 113.2(5)     | 113.2178   |             |              |            |

**Table S2.** Hydrogen bond parameters donor/acceptor scheme (Å,°) of Ni complex

| D–H...A       | D–H    | H...A | D...A    | D–H...A | Symmetry code |
|---------------|--------|-------|----------|---------|---------------|
| N3–H5 ... C11 | 0.8600 | 2.250 | 3.11(2)  | 174.00  | 1/2+x,y,1-z   |
| C4–H4 ... C11 | 0.8600 | 2.864 | 3.724(2) | 161.00  |               |

$\pi \dots \pi$  Interactions (Å,°) for Ni complex

| Cg...Cg      | Cg-Cg distance (Å) | Symmetry code |
|--------------|--------------------|---------------|
| Cg(4)- Cg(4) | 3.83               | 3/2-X,1-Y,Z   |

C–H... $\pi$  Interactions (Å, °) for Ni complex

| X–H...Cg          | H...Cg (Å) | Symmetry code |
|-------------------|------------|---------------|
| C(1)–H(1)...Cg(1) | 3.0        | X,3/2-Y,1/2-Z |
| C(1)–H(1)...Cg(2) | 3.23       | X,Y,Z         |

### Reproducibility of the single crystals of nickel complex 1

Despite several attempts to reproduce the single crystals of complex 1 for improving the measured data, we are failed to get the suitable crystals for XRD measurement. The current wet weather in the North-East region is hampering the slow evaporation method which was employed to obtain the single crystals earlier. Presently, crystallization of the complex 1 and similar substituted 2-pyridine-imidazole based nickel complexes are going on in our laboratory. We ensure you that we will keep trying to grow the suitable single crystals of the compound and record XRD data in keeping with the settings of the diffractometer as suggested by the learned reviewer. On further refinement of the present cif, we have found a disordered lattice water molecule in the crystal structure of 1. The revised cif with CCDC number 2131730 is now updated to CCDC link.

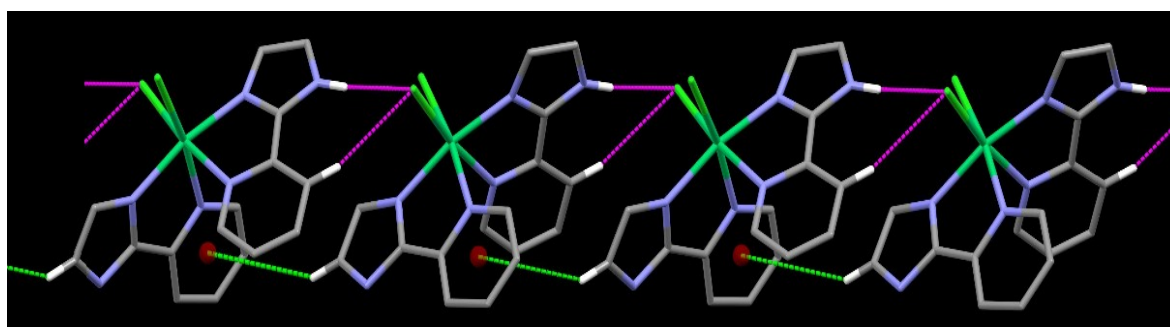

**Fig. S12.** N–H...Cl, C–H...Cl and C–H... $\pi$  interactions mediated 1D supramolecular architecture of **1** in solid state

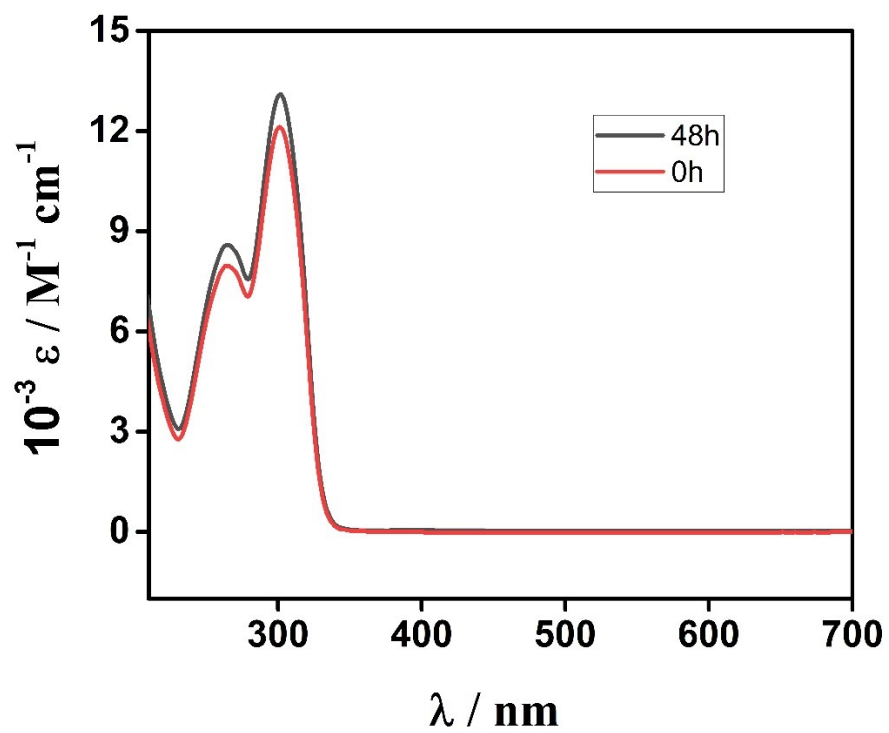

**Fig. S13.** Time-dependent UV-Vis spectra of **1** in water; (red for 0 min) and (black for 48 h).



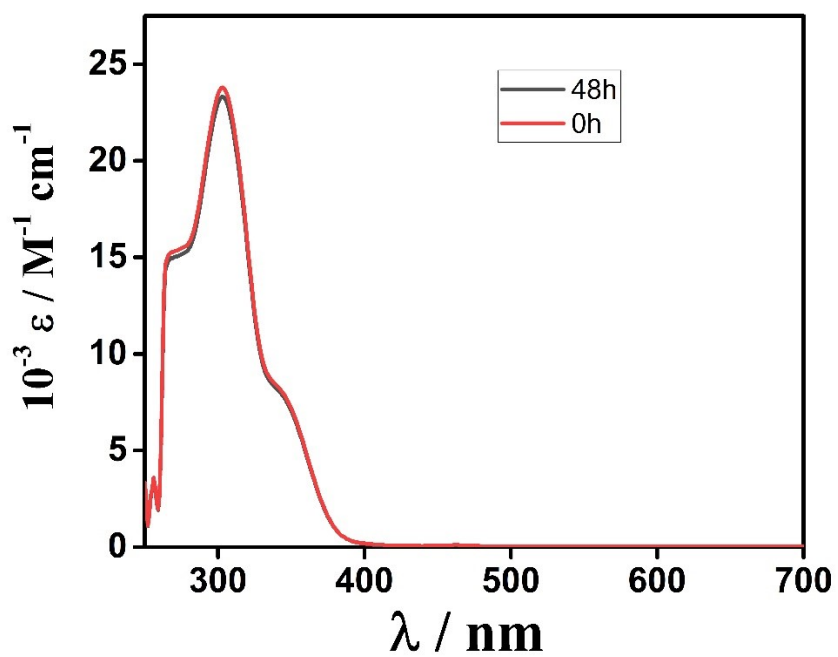

**Fig. S14.** Time-dependent UV-Vis spectra of **1** in DMF; (red for 0 min) and (black for 48 h).

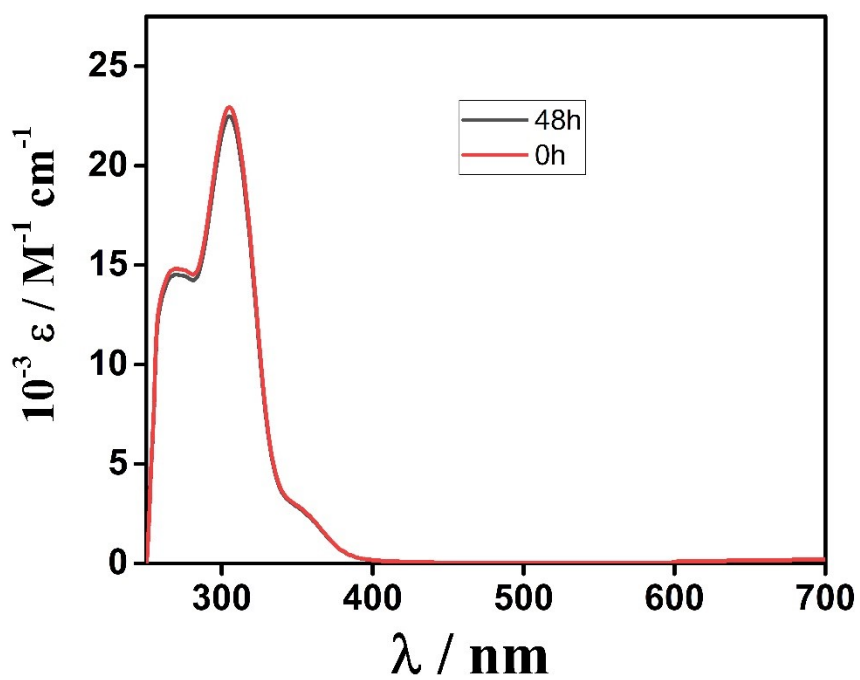

**Fig. S15.** Time-dependent UV-Vis spectra of **1** in DMSO; (red for 0 min) and (black for 48 h).

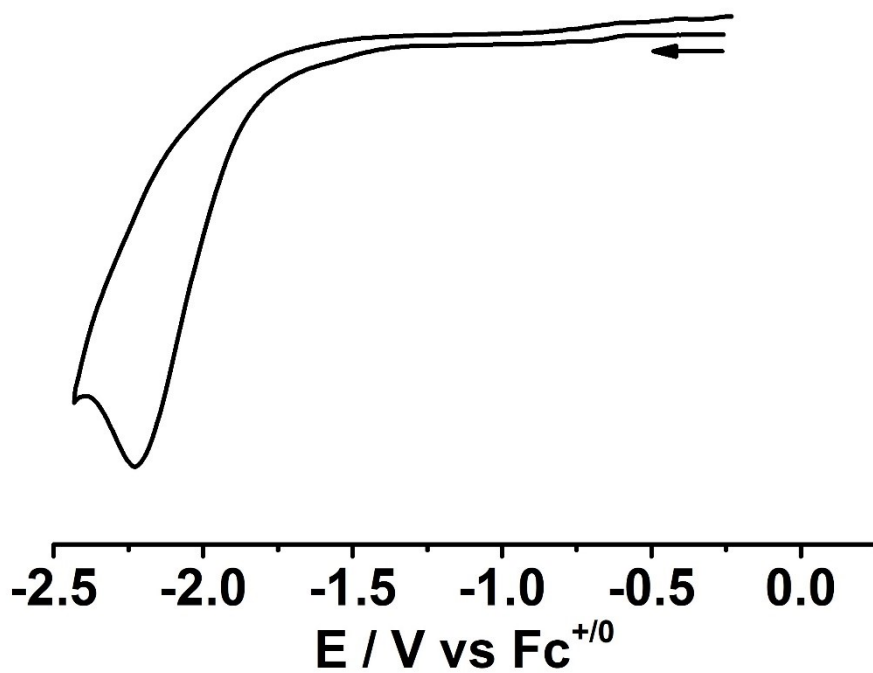

**Fig. S16.** Cyclic voltammogram of L in MeCN / 0.1 M NaCl at 298 K vs  $\text{Fc}^{+/0}$ .

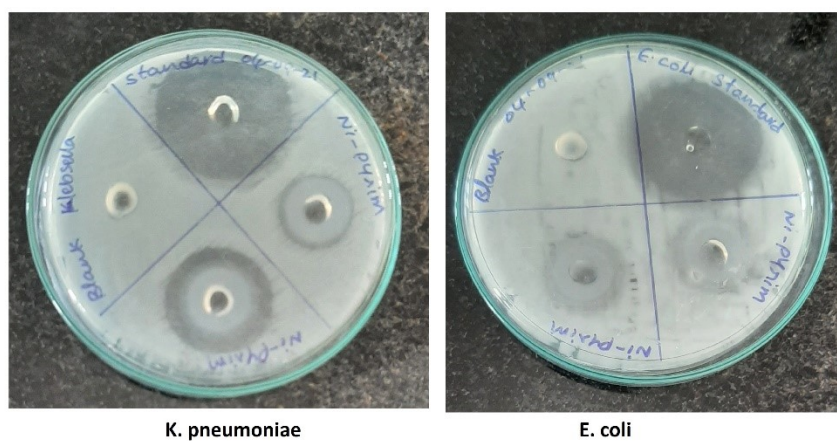

**Fig. S17** Ni complex and ciprofloxacin induced bacterial screening studies

**Table S3.** Antibacterial activity of Ni complex (1) against *E. coli*, *K. pneumoniae*

| S.NO | Test organism           | Zone of Inhibition (mm) n=2 |                   |                         |                |
|------|-------------------------|-----------------------------|-------------------|-------------------------|----------------|
|      |                         | Ni complex<br>(1)           | Ni complex<br>(2) | Ciprofloxacin<br>(50µg) | DMSO<br>(50µL) |
| 1    | <i>Escherichia coli</i> | 8                           | 6                 | 23                      | -              |
| 3    | <i>K. pneumoniae</i>    | 19                          | 16                | 24                      | -              |

(-) no zone of inhibition observed

**Table S4.** Bactericidal activity of Ni complex (1) against clinical *K. pneumoniae*

| S.NO | Test organism        | MIC (mm)<br>(µg/ml) n=3 | MIC (mm)<br>(µg/ml) n=3 | MIC (mm)<br>(µg/ml) n=3 |
|------|----------------------|-------------------------|-------------------------|-------------------------|
|      |                      | Ni complex (1)          | Ni complex (2)          | Ciprofloxacin           |
| 1    | <i>K. pneumoniae</i> | 50                      | 75                      | 19                      |

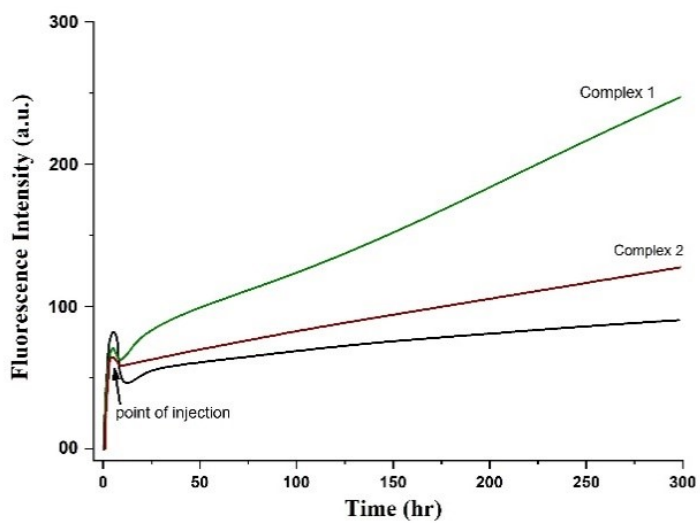

**Fig. S18** Nickel complexes induced production of ROS as revealed from the change in fluorescence intensity with DCFH-DA oxidation in presence of **1** and **2** for *pseunamone*.

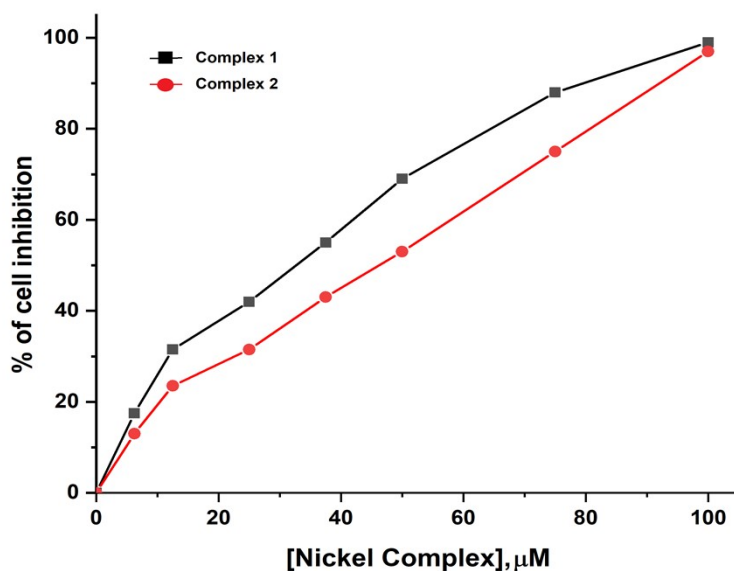

**Fig. S19** Cell viability plot of the nickel complexes against HT-29 for 24 h

## Computational details

### Theoretical calculation :

**Table S5.** Energies, enthalpies, and free energies (in Hartree) of the optimized geometries. calculated at ub3lyp level with basis set LanL2DZ for Ni complexes and 6-311g for other elements.

| COMPOUND  | ZPE      | $\Delta E$ | $\Delta H$ | $\Delta G$ | E                | H                | G                |
|-----------|----------|------------|------------|------------|------------------|------------------|------------------|
| Complex 1 | 0.289418 | 0.311183   | 0.312127   | 0.235542   | -<br>1145.501132 | -<br>1145.500188 | -<br>1145.576773 |
| Complex 2 | 0.812179 | 0.857991   | 0.858935   | 0.730804   | -<br>3321.795141 | -<br>3321.794197 | -<br>3321.922328 |

|                               |          |          |          |           |             |             |             |
|-------------------------------|----------|----------|----------|-----------|-------------|-------------|-------------|
| Ligand L                      | 0.140652 | 0.148610 | 0.149555 | 0.106804  | -473.124466 | -473.123522 | -473.166273 |
| Ligand L'                     | 0.428369 | 0.450568 | 0.451512 | 0.375756  | -907.901035 | -907.900091 | -907.975847 |
| O <sub>2</sub>                | 0.003314 | 0.005681 | 0.006625 | -0.016728 | -150.315800 | -150.314856 | -150.338209 |
| H <sub>2</sub> O <sub>2</sub> | 0.024514 | 0.027433 | 0.028378 | 0.002275  | -151.527906 | -151.526962 | -151.553064 |
| HCl                           | 0.006096 | 0.008456 | 0.009401 | -0.011854 | -460.803150 | -460.802206 | -460.823460 |

## Coordinates of all the optimised geometries:

### Complex 1

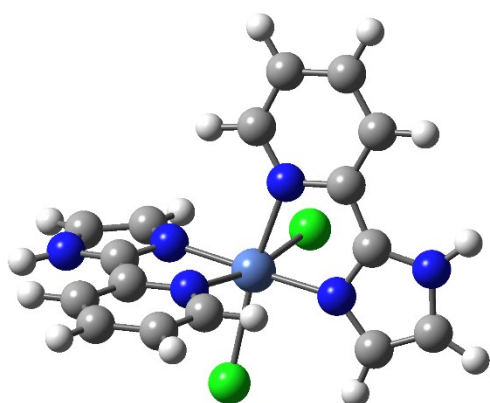

|    |          |           |          |
|----|----------|-----------|----------|
| Ni | 5.095000 | 11.985000 | 3.083000 |
| Cl | 3.445000 | 10.212000 | 3.274000 |
| N  | 6.606000 | 10.568000 | 3.542000 |
| N  | 5.277000 | 12.242000 | 5.089000 |
| N  | 6.276000 | 11.721000 | 6.942000 |
| H  | 6.800000 | 11.331000 | 7.500000 |
| C  | 7.253000 | 9.775000  | 2.714000 |
| H  | 7.037000 | 9.789000  | 1.810000 |
| C  | 8.258000 | 8.909000  | 3.160000 |
| H  | 8.694000 | 8.348000  | 2.560000 |
| C  | 8.583000 | 8.896000  | 4.424000 |
| H  | 9.266000 | 8.340000  | 4.722000 |
| C  | 7.905000 | 9.717000  | 5.333000 |

|    |          |           |           |
|----|----------|-----------|-----------|
| H  | 8.103000 | 9.693000  | 6.241000  |
| C  | 6.943000 | 10.555000 | 4.846000  |
| C  | 6.176000 | 11.451000 | 5.627000  |
| C  | 5.400000 | 12.725000 | 7.233000  |
| H  | 5.262000 | 13.113000 | 8.066000  |
| C  | 4.772000 | 13.046000 | 6.080000  |
| H  | 4.115000 | 13.696000 | 5.976000  |
| Cl | 3.445000 | 13.758000 | 2.891000  |
| N  | 6.606000 | 13.402000 | 2.623000  |
| N  | 5.277000 | 11.728000 | 1.076000  |
| N  | 6.276000 | 12.249000 | -0.777000 |
| H  | 6.800000 | 12.639000 | -1.335000 |
| C  | 7.253000 | 14.195000 | 3.451000  |
| H  | 7.037000 | 14.181000 | 4.355000  |
| C  | 8.258000 | 15.061000 | 3.005000  |
| H  | 8.694000 | 15.622000 | 3.605000  |
| C  | 8.583000 | 15.074000 | 1.741000  |
| H  | 9.266000 | 15.630000 | 1.443000  |
| C  | 7.905000 | 14.253000 | 0.832000  |
| H  | 8.103000 | 14.277000 | -0.076000 |
| C  | 6.943000 | 13.415000 | 1.319000  |
| C  | 6.176000 | 12.519000 | 0.538000  |
| C  | 5.400000 | 11.245000 | -1.068000 |
| H  | 5.262000 | 10.857000 | -1.901000 |
| C  | 4.772000 | 10.924000 | 0.085000  |
| H  | 4.115000 | 10.274000 | 0.189000  |

## Complex 2

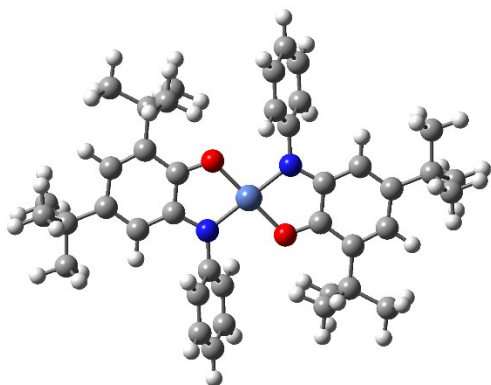

|    |           |           |           |
|----|-----------|-----------|-----------|
| Ni | -0.000018 | 0.000052  | -0.000073 |
| O  | 1.272083  | -1.328690 | -0.034371 |
| N  | 1.422583  | 1.205379  | -0.112503 |
| C  | 3.648277  | -1.698417 | -0.058552 |
| C  | 3.522480  | -3.223792 | -0.170542 |
| C  | 4.863521  | -1.004248 | -0.030651 |
| H  | 5.636215  | -1.522307 | -0.050986 |
| C  | 5.039256  | 0.375443  | 0.023136  |
| C  | 6.440708  | 1.004743  | 0.157393  |
| C  | 2.487654  | -0.854745 | -0.039074 |
| C  | 1.358923  | 2.735779  | -0.195938 |
| C  | 4.904972  | -3.918678 | -0.196629 |
| H  | 5.388770  | -3.642669 | -0.978242 |
| H  | 4.786143  | -4.871538 | -0.215026 |
| H  | 5.401319  | -3.673506 | 0.588108  |
| C  | 2.649885  | 0.563591  | -0.096402 |
| C  | 0.993519  | 4.769472  | 0.972086  |
| H  | 0.812051  | 5.252146  | 1.746565  |
| C  | 3.926039  | 1.197305  | -0.018091 |

|   |          |           |           |
|---|----------|-----------|-----------|
| H | 4.007468 | 2.121797  | 0.006595  |
| C | 1.107601 | 5.354230  | -0.172813 |
| H | 1.078730 | 6.284627  | -0.194182 |
| C | 2.808243 | -3.575673 | -1.480977 |
| H | 2.038414 | -3.013178 | -1.587741 |
| H | 2.532028 | -4.494592 | -1.458245 |
| H | 3.408245 | -3.439127 | -2.218597 |
| C | 1.156841 | 3.360930  | 0.997349  |
| C | 1.530527 | 3.078998  | -1.513461 |
| H | 1.733819 | 2.561417  | -2.258850 |
| C | 2.734614 | -3.759546 | 1.045747  |
| H | 3.212522 | -3.553103 | 1.851744  |
| H | 2.630306 | -4.710567 | 0.967754  |
| H | 1.866934 | -3.344298 | 1.072136  |
| C | 1.266512 | 4.688339  | -1.358193 |
| H | 1.222822 | 5.191043  | -2.138990 |
| C | 7.507012 | 0.122753  | -0.405502 |
| H | 7.644720 | -0.626042 | 0.178149  |
| H | 8.324445 | 0.620873  | -0.484196 |
| H | 7.238887 | -0.191752 | -1.271562 |
| C | 6.676524 | 1.236495  | 1.655395  |
| H | 6.685083 | 2.179943  | 1.833911  |
| H | 7.517817 | 0.852604  | 1.910557  |
| H | 5.969845 | 0.822191  | 2.156867  |
| C | 6.513939 | 2.335103  | -0.535220 |
| H | 6.272937 | 2.226432  | -1.459886 |
| H | 7.407933 | 2.676993  | -0.476148 |



|   |           |           |           |
|---|-----------|-----------|-----------|
| H | 5.906264  | 2.947651  | -0.115437 |
| O | -1.271629 | 1.327944  | 0.034418  |
| N | -1.422619 | -1.205274 | 0.112356  |
| C | -3.648313 | 1.698521  | 0.058405  |
| C | -3.522516 | 3.223896  | 0.170395  |
| C | -4.863556 | 1.004352  | 0.030504  |
| H | -5.635760 | 1.521561  | 0.051033  |
| C | -5.039292 | -0.375339 | -0.023282 |
| C | -6.440743 | -1.004639 | -0.157540 |
| C | -2.487689 | 0.854850  | 0.038928  |
| C | -1.358959 | -2.735675 | 0.195791  |
| C | -4.905007 | 3.918783  | 0.196482  |
| H | -5.388315 | 3.641923  | 0.978289  |
| H | -4.786179 | 4.871643  | 0.214879  |
| H | -5.401354 | 3.673610  | -0.588254 |
| C | -2.650166 | -0.563408 | 0.097222  |
| C | -0.993555 | -4.769368 | -0.972233 |
| H | -0.812086 | -5.252042 | -1.746712 |
| C | -3.926074 | -1.197200 | 0.017944  |
| H | -4.007259 | -2.122463 | -0.005582 |
| C | -1.107636 | -5.354126 | 0.172666  |
| H | -1.078765 | -6.284523 | 0.194035  |
| C | -2.808279 | 3.575777  | 1.480830  |
| H | -2.038449 | 3.013282  | 1.587594  |
| H | -2.532309 | 4.494775  | 1.459065  |
| H | -3.408281 | 3.439232  | 2.218450  |
| C | -1.156877 | -3.360826 | -0.997496 |

|   |           |           |           |
|---|-----------|-----------|-----------|
| C | -1.530808 | -3.078815 | 1.514281  |
| H | -1.734100 | -2.561234 | 2.259669  |
| C | -2.734895 | 3.759729  | -1.044928 |
| H | -3.212557 | 3.553207  | -1.851891 |
| H | -2.630096 | 4.709901  | -0.966740 |
| H | -1.866970 | 3.344402  | -1.072282 |
| C | -1.266547 | -4.688235 | 1.358046  |
| H | -1.222368 | -5.191789 | 2.139038  |
| C | -7.507048 | -0.122649 | 0.405355  |
| H | -7.644265 | 0.625297  | -0.178102 |
| H | -8.324480 | -0.620769 | 0.484049  |
| H | -7.238923 | 0.191856  | 1.271416  |
| C | -6.676070 | -1.237241 | -1.655348 |
| H | -6.685119 | -2.179839 | -1.834057 |
| H | -7.517852 | -0.852500 | -1.910704 |
| H | -5.969390 | -0.822937 | -2.156820 |
| C | -6.513975 | -2.334999 | 0.535074  |
| H | -6.272483 | -2.227178 | 1.459934  |
| H | -7.407968 | -2.676889 | 0.476001  |
| H | -5.905810 | -2.948397 | 0.115485  |
| H | 1.137611  | 2.772271  | 1.890664  |
| H | -1.137341 | -2.772477 | -1.891008 |

**Ligand L**

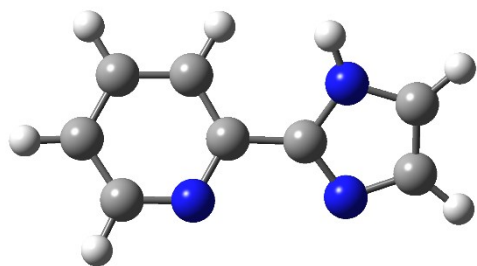

|   |           |           |           |
|---|-----------|-----------|-----------|
| N | -1.068435 | -0.853584 | 0.665822  |
| N | -1.511807 | 1.113854  | -0.636002 |
| N | -3.493666 | 1.644504  | -0.048449 |
| H | -4.386011 | 1.598821  | 0.402346  |
| C | -0.650027 | -1.862257 | 1.367784  |
| H | 0.344669  | -2.235970 | 1.252194  |
| C | -1.514166 | -2.471664 | 2.283731  |
| H | -1.170090 | -3.300468 | 2.856531  |
| C | -2.781164 | -2.010713 | 2.438897  |
| H | -3.447946 | -2.497025 | 3.117871  |
| C | -3.191480 | -0.889655 | 1.698875  |
| H | -4.176305 | -0.476208 | 1.806391  |
| C | -2.296180 | -0.344478 | 0.850059  |
| C | -2.485306 | 0.784735  | 0.088865  |
| C | -3.067787 | 2.588153  | -0.909588 |
| H | -3.629251 | 3.435509  | -1.247485 |
| C | -1.787374 | 2.256357  | -1.266216 |
| H | -1.133096 | 2.796664  | -1.921509 |

**Ligand L'**

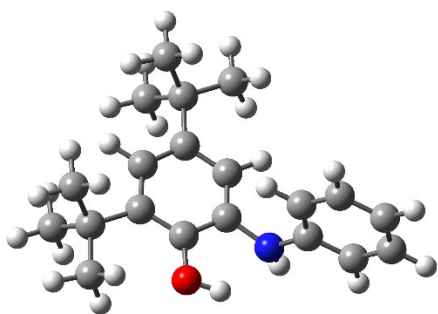

|   |          |           |           |
|---|----------|-----------|-----------|
| C | 1.790219 | -0.012929 | 0.597565  |
| C | 3.150887 | -0.151533 | 0.903183  |
| C | 3.942220 | 0.986588  | 1.109523  |
| C | 3.372929 | 2.263235  | 1.010081  |
| C | 2.012039 | 2.401812  | 0.704987  |
| C | 1.220719 | 1.263724  | 0.498982  |
| H | 3.585522 | -1.126390 | 0.978969  |
| H | 0.181724 | 1.369457  | 0.266236  |
| O | 4.180708 | 3.424427  | 1.220058  |
| N | 5.369405 | 0.841413  | 1.430295  |
| C | 1.386073 | 3.804654  | 0.595998  |
| C | 0.920868 | -1.263535 | 0.369870  |
| C | 6.417090 | -0.390801 | -0.459004 |
| C | 7.164759 | -0.406863 | -1.644132 |
| C | 7.648222 | 0.792575  | -2.183782 |
| C | 7.383911 | 2.008065  | -1.538466 |
| C | 6.636338 | 2.024121  | -0.353236 |
| C | 6.153064 | 0.824676  | 0.186665  |
| H | 6.047895 | -1.306547 | -0.047020 |
| H | 7.366514 | -1.334932 | -2.136888 |
| H | 8.219260 | 0.780319  | -3.088607 |

|   |           |           |           |
|---|-----------|-----------|-----------|
| H | 7.752960  | 2.923835  | -1.950673 |
| H | 6.434555  | 2.952261  | 0.139567  |
| C | 2.008295  | 3.937835  | -0.806425 |
| H | 3.075100  | 3.945132  | -0.724087 |
| H | 1.702953  | 3.110280  | -1.412194 |
| H | 1.679167  | 4.850630  | -1.257423 |
| C | 0.230078  | 4.629536  | 0.000140  |
| H | 0.574926  | 5.617521  | -0.222722 |
| H | -0.116273 | 4.161668  | -0.897679 |
| H | -0.571583 | 4.682533  | 0.706789  |
| C | 0.153084  | 3.104637  | 1.197176  |
| H | 0.254975  | 2.045270  | 1.086365  |
| H | 0.075675  | 3.348703  | 2.236042  |
| H | -0.728061 | 3.433522  | 0.686921  |
| H | 5.513965  | -0.014644 | 1.926513  |
| H | 4.884759  | 3.216831  | 1.838877  |
| C | -0.208582 | -0.929764 | -0.622485 |
| H | -0.813455 | -0.142794 | -0.222823 |
| H | 0.215523  | -0.615994 | -1.553302 |
| H | -0.812594 | -1.798553 | -0.780668 |
| C | 1.791744  | -2.395975 | -0.205513 |
| H | 1.187872  | -3.265014 | -0.363957 |
| H | 2.576510  | -2.627757 | 0.483877  |
| H | 2.215911  | -2.081954 | -1.136194 |
| C | 0.310309  | -1.715061 | 1.709766  |
| H | -0.293550 | -2.584093 | 1.551713  |
| H | 1.095007  | -1.946492 | 2.399370  |

H                    -0.294800 -0.927904 2.109070

**Reference:**

1. B. Chiswell, F. Lions, and B. Morris, *Inorg. Chem.*, 1964, **3**, 110.
